# Supplementary material for: El añil, de José Ramón Martín Largo
Source: Royal Society of Chemistry journal article supplement (doi:10.1039/c5nr01519g), 1997-01-01
Supplement: c5nr01519g1.pdf [file c5nr01519g1.pdf]

Supplementary Information for

**Nitrogen and Phosphorus co-doped Graphene Quantum Dots: Synthesis from Adenosine triphosphate, Optical Properties, and Cellular Imaging**

Arundithi Ananthanarayanan<sup>a</sup>, Yue Wang<sup>b</sup>, Parimal Routh<sup>a</sup>, Mahasin Alam Sk<sup>a</sup>, Aung Than<sup>a</sup>, Ming Lin<sup>c</sup>, Jie Zhang<sup>c</sup>, Jie Chen<sup>a</sup>, Handong Sun<sup>b</sup> and Peng Chen<sup>a\*</sup>

<sup>a</sup> Bioengineering Program, School of Chemical and Biomedical Engineering, Nanyang Technological University, 70 Nanyang Drive, Singapore 637457

E-mail: ChenPeng@ntu.edu.sg

<sup>b</sup> Division of Physics and Applied Physics, School of Physical and Mathematical Sciences, Nanyang Technological University, 21 Nanyang Link, Singapore 637371

<sup>c</sup> Institute of Materials Research and Engineering, A\*STAR (Agency for Science, Technology and Research), 3 Research Link, Singapore 117602

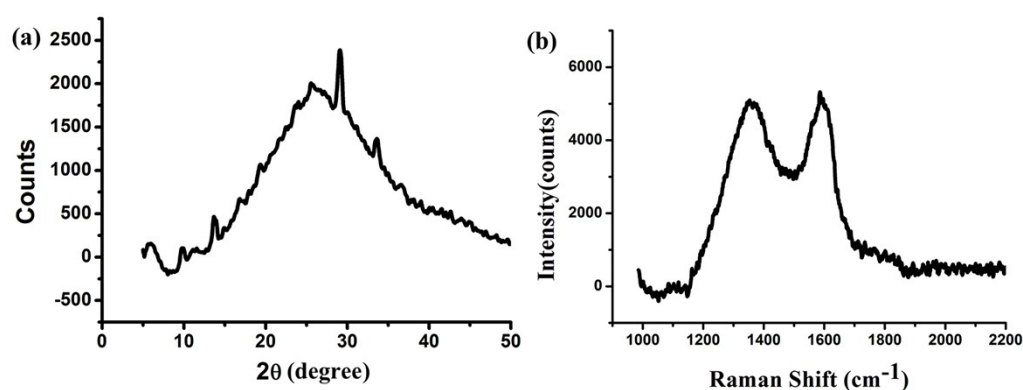

**Figure S1** (a) XRD and (b) Raman spectrum of ATP-GQDs.

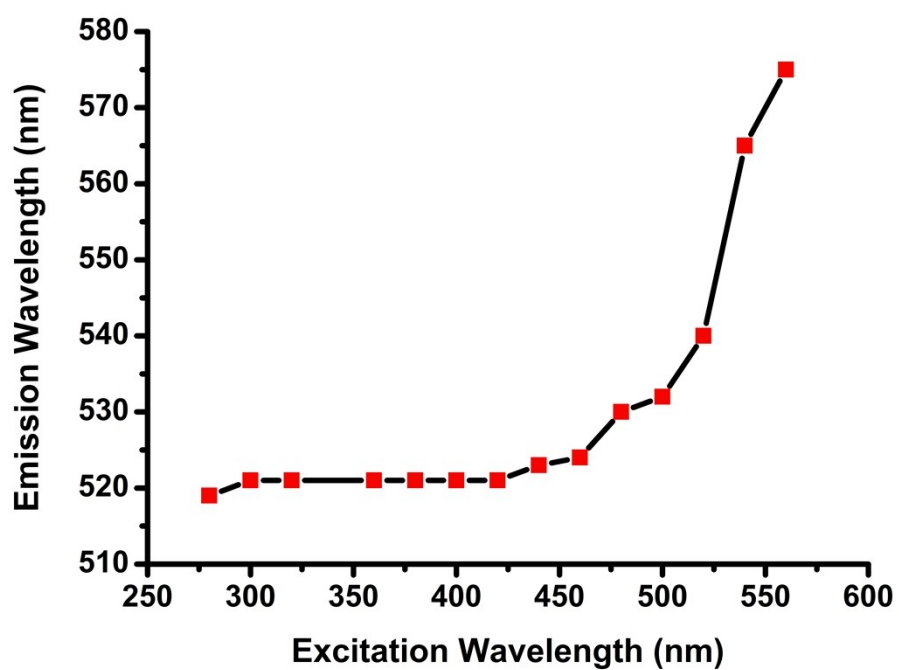

**Figure S2** Excitation wavelength vs. emission peak position

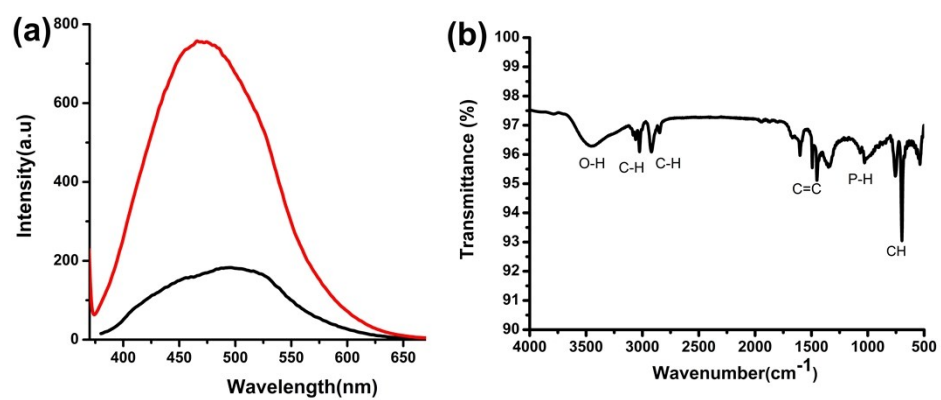

**Figure S3.** (a) PL spectra of ATP-GQDs before (black) and after (red) chemical reduction. (b) FTIR spectrum of ATP-GQDs after reduction with  $\text{NaBH}_4$ .

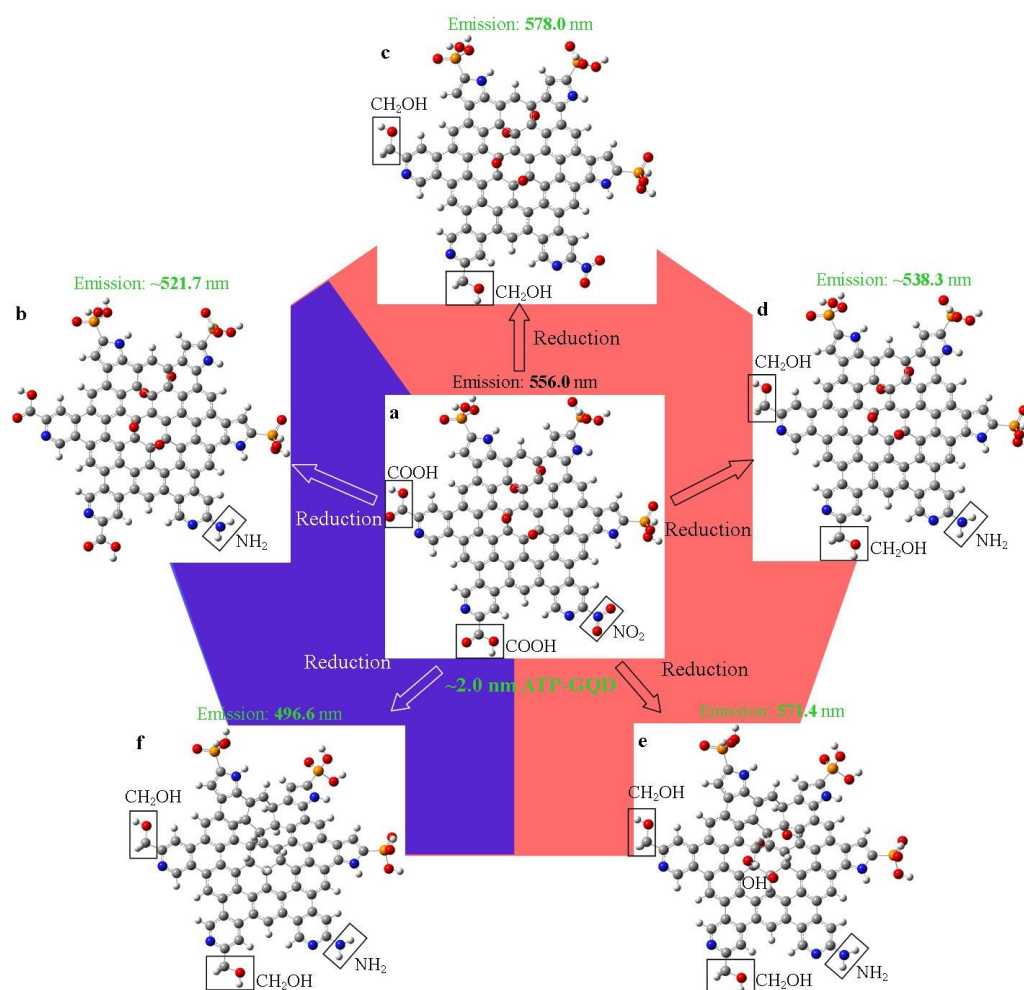

**Figure S4.** Hypothetical model of (a) ATP-GQD and (b-e) its different reduced forms.

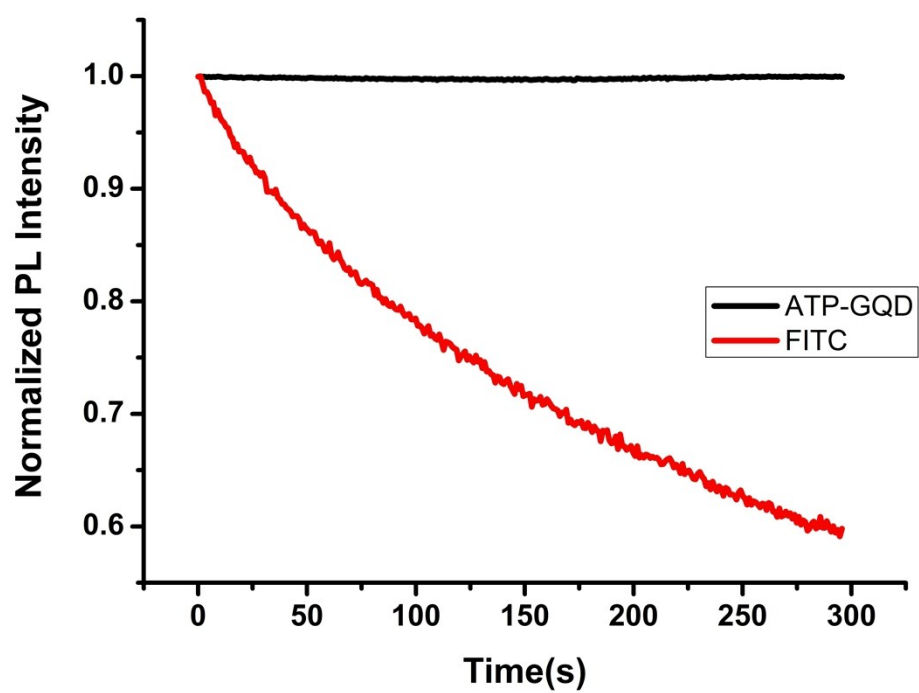

**Figure S5.** Normalized PL intensity vs. time of ATP-GQDs (black) and FITC molecules (red) under confocal laser scanning microscope (excitation at 488 nm).

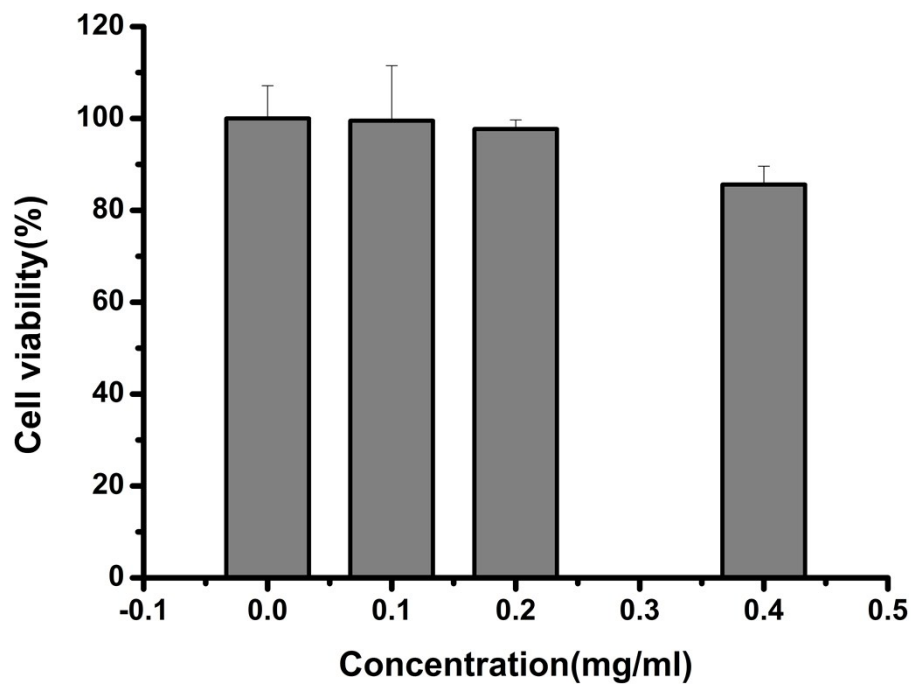

**Figure S6.** Effect of addition of ATP-GQDs with different concentrations on the viability of HeLa cells. Error bars indicate the standard deviation from 3 independent experiments.

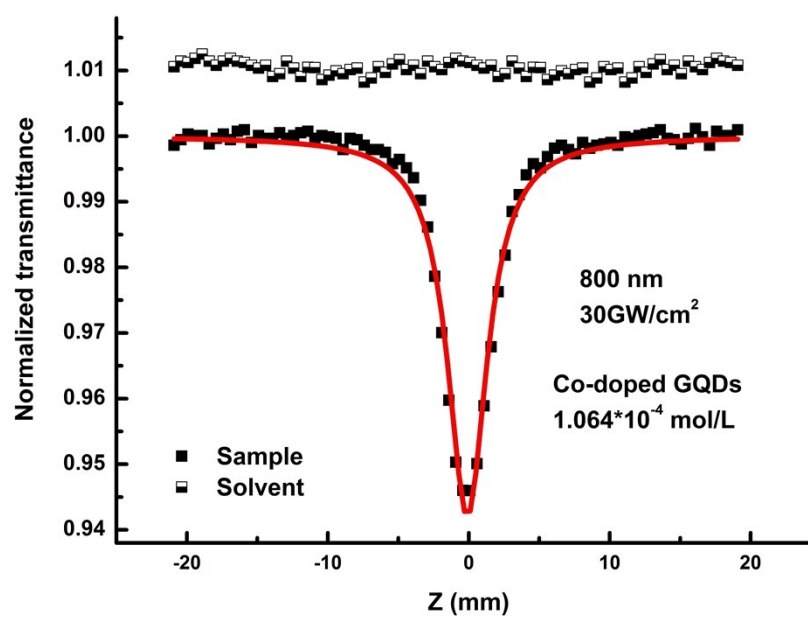

**Figure S7.** Z-scan of ATP-GQDs and water (solvent control).

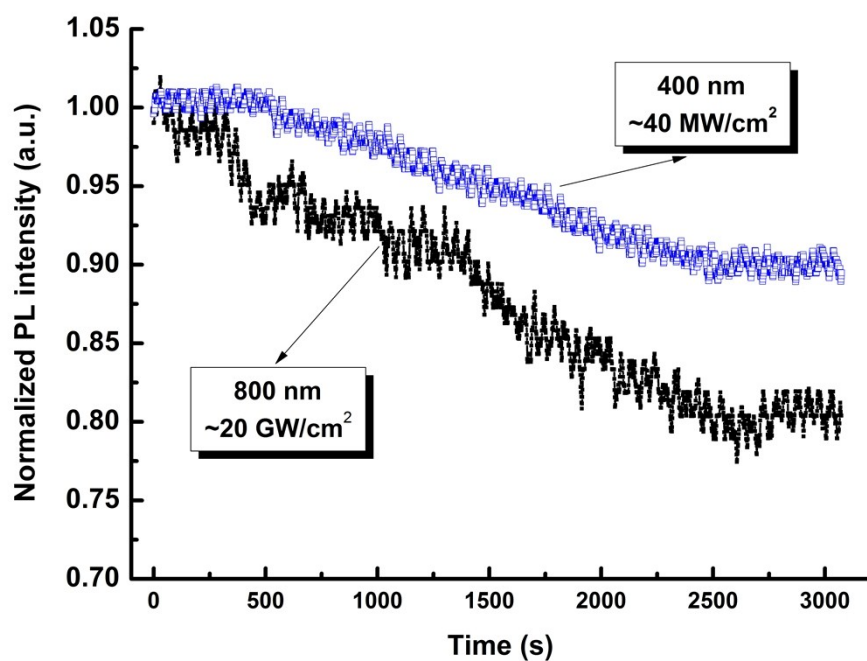

**Figure S8.** Normalized PL intensity vs. time of ATP-GQDs under one (blue) or two-photon (black) excitation.

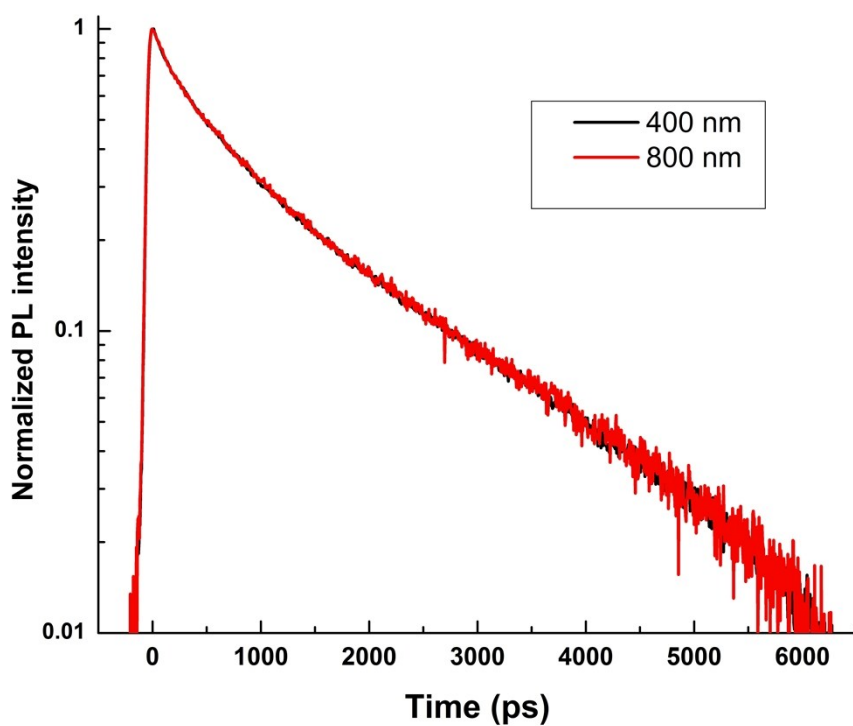

**Figure S9.** Fluorescence decay of ATP-GQDs under one- (400 nm) or two-photon (800 nm) excitation.

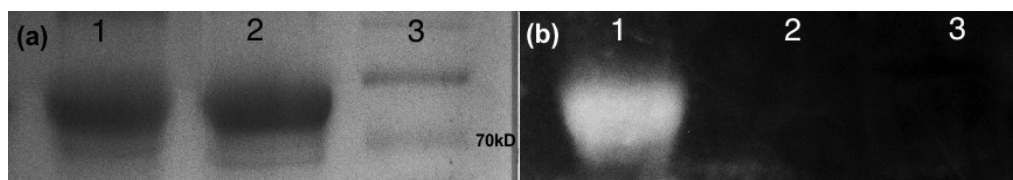

**Fig S10.** Gel electrophoresis images of Tr-GQDs (lane 1), transferrin (lane 2) and protein marker (lane 3) under white light (a) and 488 nm excitation (b).
